# Supplementary material for: Homologous and Heterologous Anti-COVID-19 Vaccination Does Not Induce New-Onset Formation of Autoantibodies Typically Accompanying Lupus Erythematodes, Rheumatoid Arthritis, Celiac Disease and Antiphospholipid Syndrome
Source: MDPI journal article supplement (doi:10.3390/vaccines10020333), 2022-02-18
Supplement: s1 [file s1]

## Supplementary figures

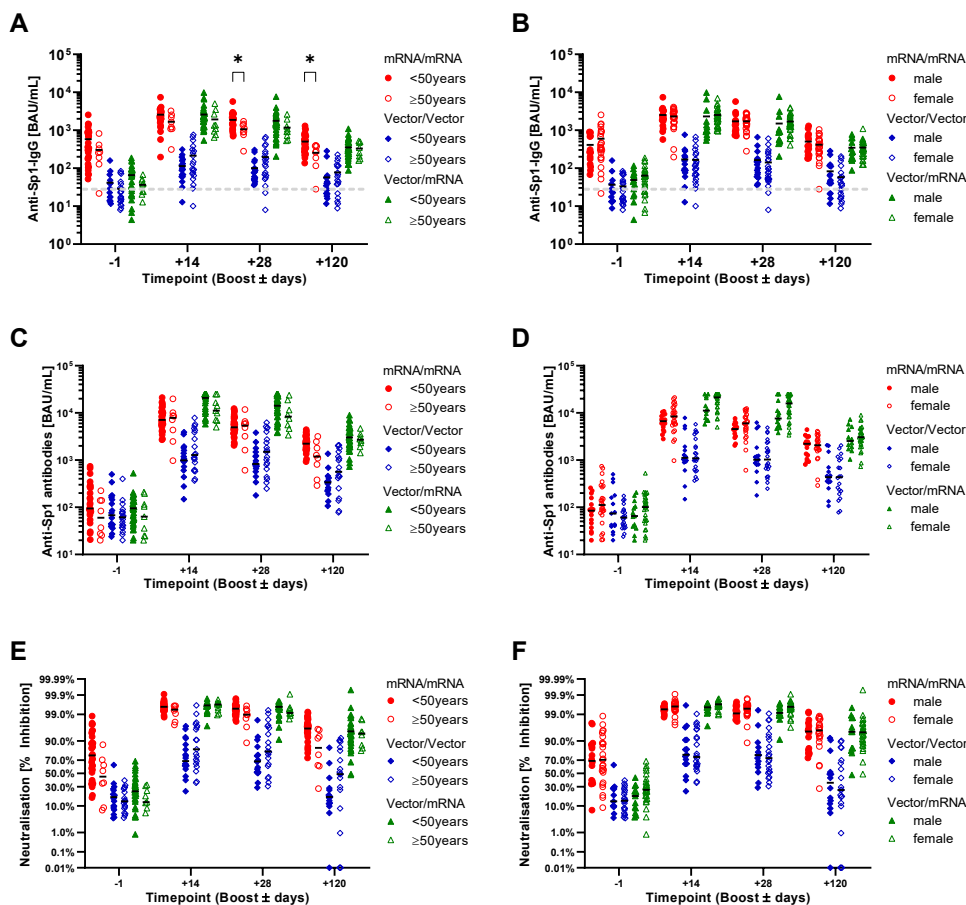

**Figure S1:** Analysis of anti-SARS-CoV-2-Sp1 antibodies in the different groups (red – mRNA/mRNA, blue – Vector/Vector, green mRNA/Vector) with respect to age and gender. (A, C, and E) Anti-SARS-CoV-2-Sp1-IgG (A), anti-SARS-CoV-2-Sp1 antibodies (C) and neutralizing antibodies (E) in individuals <50 years (filled symbols) and  $\geq 50$  years (open symbols). (B, D, and F) Anti-SARS-CoV-2-Sp1-IgG (B), anti-SARS-CoV-2-Sp1 antibodies (D) and neutralizing antibodies (F) in males (filled symbols) and females (open symbols). Statistical analyses by Mixed-effects analysis with Tukey's multiple comparison test (A). \*  $p < 0.05$

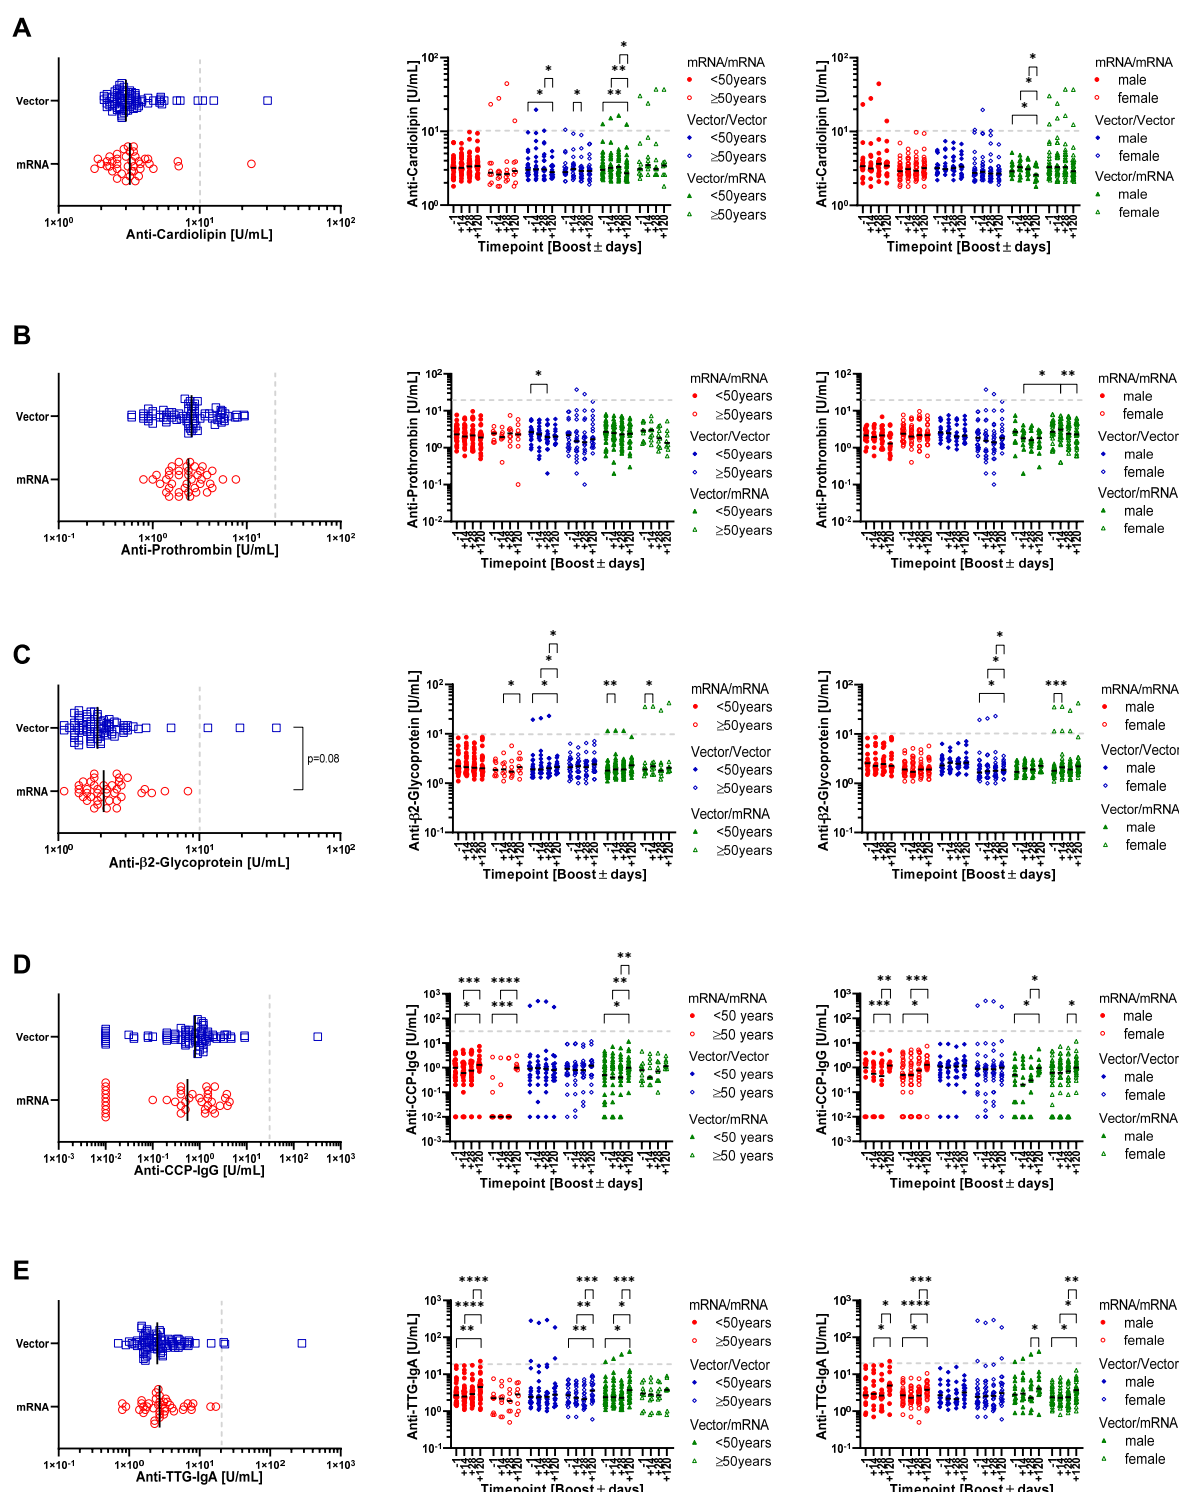

**Figure S2: Analysis of autoantibodies based on prime vaccinations in serum samples 1 day before boost (blue – vector prime, red – mRNA prime) and in the different groups (red – mRNA/mRNA, blue – Vector/Vector, green mRNA/Vector) with respect to age and gender. (A) Anti-Cardiolipin antibodies: left, autoantibody levels before boost based on prime vaccinations; middle, analysis in individuals <50 years (filled symbols) and ≥50 years (open symbols) based on the study groups; right, analysis in males (filled symbols) and females (open symbols) based on the study groups. (B) Anti-Prothrombin antibodies: left, autoantibody levels before boost based on prime vaccinations; middle, analysis in**

individuals <50 years (filled symbols) and ≥50 years (open symbols) based on the study groups; right, analysis in males (filled symbols) and females (open symbols) based on the study groups. **(C)** Anti-β2-Glycoprotein antibodies: left, autoantibody levels before boost based on prime vaccinations; middle, analysis in individuals <50 years (filled symbols) and ≥50 years (open symbols) based on the study groups; right, analysis in males (filled symbols) and females (open symbols) based on the study groups. **(D)** Anti-CCP antibodies: left, autoantibody levels before boost based on prime vaccinations; middle, analysis in individuals <50 years (filled symbols) and ≥50 years (open symbols) based on the study groups; right, analysis in males (filled symbols) and females (open symbols) based on the study groups. **(E)** Anti-TTG antibodies: left, autoantibody levels before boost based on prime vaccinations; middle, analysis in individuals <50 years (filled symbols) and ≥50 years (open symbols) based on the study groups; right, analysis in males (filled symbols) and females (open symbols) based on the study groups. Statistical analyses by Mixed-effects analysis with Tukey's multiple comparison test within and between groups **(A-C)**. \*  $p < 0.05$ , \*\*  $p < 0.01$ , \*\*\*  $p < 0.001$ , \*\*\*\*  $p < 0.001$

**Table 1.** Number of samples analyzed with the different methods at the different timepoints.

| timepoint                      | mRNA/mRNA |    |    |     | Vector/Vector |    |    |     | Vector/mRNA |    |    |     |
|--------------------------------|-----------|----|----|-----|---------------|----|----|-----|-------------|----|----|-----|
|                                | -1        | 14 | 28 | 120 | -1            | 14 | 28 | 120 | -1          | 14 | 28 | 120 |
| anti-SARS-CoV-2-Sp1-IgG        | 41        | 41 | 40 | 39  | 37            | 37 | 37 | 34  | 42          | 42 | 42 | 41  |
| anti-SARS-CoV-2-Sp1 antibodies | 41        | 41 | 40 | 38  | 37            | 37 | 37 | 34  | 42          | 41 | 41 | 41  |
| neutralizing antibodies        | 41        | 41 | 40 | 38  | 37            | 37 | 37 | 34  | 42          | 42 | 42 | 41  |
| IFN-γ release assay            |           |    |    | 39  |               |    |    | 33  |             |    |    | 41  |
| anti-Prothrombin               | 41        | 41 | 40 | 39  | 37            | 37 | 37 | 34  | 42          | 42 | 42 | 41  |
| anti-Cardiolipin               | 41        | 41 | 40 | 39  | 37            | 37 | 37 | 34  | 42          | 42 | 42 | 41  |
| anti-β2-Glycoprotein           | 41        | 41 | 40 | 39  | 37            | 37 | 37 | 34  | 42          | 42 | 42 | 41  |
| anti-CCP                       | 41        | 41 | 40 | 39  | 37            | 37 | 37 | 34  | 42          | 42 | 42 | 41  |
| anti-TTG-IgA                   | 41        | 41 | 40 | 39  | 37            | 37 | 37 | 34  | 42          | 42 | 42 | 41  |
| ANA                            | 41        | 41 | 40 | 39  | 37            | 37 | 37 | 34  | 42          | 42 | 42 | 41  |
